# Supplementary material
Source: Springer Nature journal article supplement (https://www.springermedizin.de/resource/supplementary/12950_2014_366_MOESM5_ESM.pdf/9557670)

$r = -.33$ ;  $P = .046$

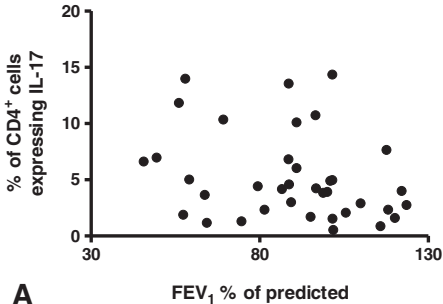

$r = .43$ ;  $P = .01$

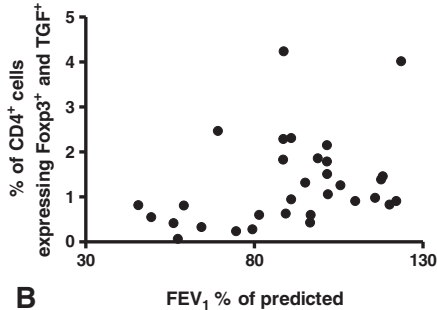

Supplement: MOESM5 [file 9557670]
